# Supplementary material for: Intersectin (ITSN) Family of Scaffolds Function as Molecular Hubs in Protein Interaction Networks
Source: PubMed Central journal article supplement (PMC3338775; doi:10.1371/journal.pone.0036023), 2012-04-27
Supplement: pone.0036023.s001.pdf [file pone.0036023.s001.pdf]

**Table S1. ITSN1 yeast two-hybrid results**

| aa coordinates | Prey Name              | Accession# | Prey description                                             | Prey-regions bound                      | Library screened* | Functional Pathways** |
|----------------|------------------------|------------|--------------------------------------------------------------|-----------------------------------------|-------------------|-----------------------|
| 1-118          | <b>EPSIN2a</b>         | NP_683723  | epsin 2a                                                     | 320-422                                 | a                 | 1, 2                  |
|                | <b>mEpsin2</b>         | NP_034278  | intersectin-EH binding protein 2                             | 337-595                                 | b                 | 1, 2                  |
|                | <b>CALM</b>            | NP_009097  | clathrin assembly protein<br>lymphoid myeloid leukemia       | 413-652                                 | c                 | 1, 2                  |
|                | <b>mPICALM</b>         | NP_666306  | phosphatidylinositol binding<br>clathrin assembly protein    | 380-665                                 | b                 | 1, 2                  |
|                | <b>FNBP4</b>           | NP_056123  | formin binding protein 4                                     | 468-618                                 | a                 | 2                     |
|                | <b>ZFPM2;<br/>FOG2</b> | NP_036214  | transcription factor GATA4,<br>modulator of; friend of GATA2 | 417-938                                 | a                 | 6                     |
|                | <b>HRB</b>             | NP_004495  | HIV-1 Rev binding protein;<br>necleoporin-like protein       | 71-562                                  | c                 | 3, 4                  |
|                | <b>mHRBL</b>           | NP_835456  | HIV-1 Rev-binding protein-like<br>protein                    | 59-479; 296-479; 342-479;305-481        | b                 | 3, 4                  |
| 1-313          | <b>RAB11-FIP2</b>      | Q7L804     | rab11-family interacting protein 2                           | 98-512                                  | a                 | 3, 4                  |
|                | <b>mPICALM</b>         |            | phosphatidylinositol binding<br>clathrin assembly protein    | 310                                     | c                 | 1, 2                  |
|                | <b>Dab2</b>            | NP_001334  | disabled-2                                                   | 242-770                                 | c                 | 1                     |
|                | <b>HRB</b>             | NP_004495  | HIV-1 Rev binding protein;<br>necleoporin-like protein       | 178-484; 512;562                        | c                 | 3, 4                  |
|                | <b>mHRB</b>            | NP_034602  | HIV-1 Rev binding protein;<br>necleoporin-like protein       | 488-559                                 | b                 | 3, 4                  |
|                | <b>HRB like</b>        | NP_006067  | HIV-1 Rev binding protein-like                               | 305-481                                 | c                 | 3, 4                  |
|                | <b>mPICALM</b>         | NP_666306  | phosphatidylinositol binding<br>clathrin assembly protein    | 310-665                                 | b                 | 1, 2                  |
| 204-320        | <b>mEpsin2</b>         | NP_034278  | intersectin-EH binding protein 2                             | 337-595                                 | b                 | 1, 2                  |
| 204-522        | <b>CYLN2</b>           | NP_003379  | cytoplasmic linker protein, 115 kD                           | 716-959                                 | a                 | 5                     |
|                | <b>EPS15L</b>          | NP_067058  | Eps15-like                                                   | 247-489                                 | a                 | 1, 3                  |
|                | <b>mEPS15L1</b>        | NP_031970  | mouse Eps15-like                                             | 169-463; 192-419                        | b                 | 1, 3                  |
|                | <b>GOLGA5</b>          | NP_005104  | golgi autoantigen, golgin<br>subfamily a, 5                  | 198-501                                 | a                 | 3, 4                  |
|                | <b>ITSN1</b>           | NP_003015  | intersectin 1                                                | 204-334                                 | a                 | 1-7                   |
|                | <b>mAMOTL1</b>         | BAB30287   | angiomotin-like 1                                            | 438-691; 430-635; 255-521; 410-548      | b                 | 5                     |
|                | <b>mBECN1</b>          | AAH05770   | BCL2-interacting protein                                     | 34-394; 20-360; 35-251; 11-244; 171-261 | b                 | 3                     |
|                | <b>mHMG20A</b>         | NP_080088  | High mobility group 20A                                      | 189-346                                 | b                 | 6                     |

|                |                        |                  |                                                                                        |                                                                                           |   |         |
|----------------|------------------------|------------------|----------------------------------------------------------------------------------------|-------------------------------------------------------------------------------------------|---|---------|
|                | <b>mKRT2-1</b>         | NP_032499        | keratin complex 2; keratin 1, type II                                                  | 155-454; 194-453                                                                          | b | 5       |
|                | <b>mKRT2-6G</b>        | NP_064340        | keratin complex 2, gene 6g                                                             | 185-398                                                                                   | b | 5       |
|                | <b>mLOC223917</b>      | NP_666175        | hypothetical protein mLOC223917, similar to human keratin 6                            | 161-390                                                                                   | b | 5       |
|                | <b>mPPL</b>            | NP_032935        | periplakin                                                                             | 1125-1323; 814-1062                                                                       | b | 5       |
|                | <b>PPL</b>             | O60437           | periplakin                                                                             | 787-1104; 842-1258                                                                        | a | 5       |
|                | <b>mSWAP70</b>         | NP_033328        | SWAP complex protein, 70 kDa                                                           | 315-516                                                                                   | b | 3, 4    |
|                | <b>PIK3R1</b>          | NP_852665        | p85a phosphoinositide-3-kinase, regulatory subunit 1                                   | 309-552                                                                                   | a | 3, 4    |
|                | <b>PPFIA2</b>          | NP_003616        | protein-tyrosine phosphatase, receptor type, f polypeptide-interacting protein alpha 2 | 359-760; 385-762                                                                          | a | 2-4     |
|                | <b>PSCD1</b>           | Q15438           | cytohesin; pleckstrin homology, Sec7 and coiled/coil domains 1                         | 11-249                                                                                    | c | 3, 4    |
|                | <b>RNF40</b>           | O75150           | Ring finger 40 Ub ligase                                                               | 207-495                                                                                   | a | 3       |
| <b>350-660</b> | <b>CCDC99</b>          | NP_060255        | coiled-coil domain containing 99; Spindly protein-reg kineticores                      | 67-288; 67-289                                                                            | d | 5       |
|                | <b>CLTC</b>            | NP_004850        | clathrin heavy chain 1                                                                 | 934-1177                                                                                  | d | 1       |
|                | <b>DESM</b>            | Q15787           | desmin                                                                                 | 350-469; 336-469; 127-299; 356-448; 353-429; -18-140; 297-460; 255-358; 339-448; 268-389; | d | 5       |
|                | <b>EPS15</b>           | NP_001972        | EGFR substrate protein 15                                                              | 121-390                                                                                   | d | 1, 3    |
|                | <b>KIF16B</b>          | NP_078980        | kinesin family member 16B                                                              | 805-957                                                                                   | d | 1, 3, 5 |
| <b>520-809</b> | <b>ARFIP2</b>          | NP_036534        | arfaptin/ POR1                                                                         | 29-331                                                                                    | c | 2-4     |
|                | <b>DESM</b>            | Q15787           | desmin                                                                                 | 140-465; 166-469; 254-469                                                                 | d | 5       |
|                | <b>FBNP1</b>           | NP_055848        | formin binding protein 1; FBP17                                                        | 47-107                                                                                    | c | 1-5     |
|                | <b>GCC1</b>            | NP_078799        | golgi coiled-coil 1                                                                    | 395-592                                                                                   | a | 5       |
|                | <b>GOLGA5</b>          | NP_005104        | golgi autoantigen, golgin subfamily a, 5                                               | 198-501                                                                                   | a | 3, 4    |
|                | <b>HIP1</b>            | O00291           | huntingtin-interacting protein 1                                                       | 5-341                                                                                     | c | 1-3     |
|                | <b>MTUS2/ KIAA0774</b> | NP_00102877<br>4 | cardiac zipper protein; MT associated protein TIP150                                   | 932-1253                                                                                  | a | 5       |
|                | <b>mKRT2-1</b>         | NP_032499        | keratin complex 2; keratin 1, type II                                                  | 383-634; 416-615; 416-637; 214-498; 438-552; 168-537                                      | b | 5       |
|                | <b>mSYNC</b>           | Q9EPM5           | syncoilin                                                                              | 8-293                                                                                     | b | 5       |
|                | <b>NY-BR-15</b>        | NP_00103594<br>0 | similar to serologically defined breast cancer antigen NY-BR-15                        | 340-759                                                                                   | c | 8       |

|                  |                                 |                    |                                                                                 |                                    |   |         |
|------------------|---------------------------------|--------------------|---------------------------------------------------------------------------------|------------------------------------|---|---------|
|                  | <b>PACSIN3</b>                  | NP_057307          | protein kinase C and casein kinase substrate in neurons 3                       | 29-307; 152-298; 35-303            | a | 1, 2, 5 |
|                  | <b>PDCD6IP</b>                  | NP_037506          | Alix, ALG-2 interacting protein                                                 | 359-540                            | e | 1       |
|                  | <b>PREX1</b>                    | NP_065871          | P-REX-1                                                                         | 1012-1422                          | c | 3, 4    |
|                  | <b>RABEP1</b>                   | NP_004694          | rabaptin-5;                                                                     | 466-737; 466-728                   | a | 1, 3, 4 |
|                  | <b>RAI14</b>                    | NP_056392          | retinoic acid induced 14; novel retinal pigment epithelial gene; RAI13;         | 388-781                            | c | 8       |
|                  | <b>SCOCO</b>                    | NP_115936          | short coiled-coil protein; binds Arf like protein                               | 24-122                             | d | 3, 4    |
|                  | <b>TRIM8</b>                    | NP_112174          | tripartite motif-containing 8; ring finger protein 27; RNF27                    | 6-306                              | c | 3       |
| <b>709-981</b>   | <b>Dab2</b>                     | NP_001334          | Disabled-2                                                                      | 333-770                            | c | 1       |
|                  | <b>PI3KC2<math>\beta</math></b> | Y13892             | PI3K class 2 $\beta$ isoform                                                    | 18-476                             | c | 3       |
| <b>730-816</b>   | <b>Dab2</b>                     | NP_001334          | Disabled-2                                                                      | 501-720; 242-770; 507-770; 317-722 | c | 1       |
|                  | <b>PI3KC2<math>\beta</math></b> | Y13892             | PI3K class 2 $\beta$ isoform                                                    | 18-475; 18-480                     | c | 3       |
|                  | <b>FAM59B</b>                   | NP_00116171<br>3.1 | family with sequence similarity 59, member B,                                   | 411-609                            | a | 8       |
|                  | <b>mLOC244310</b>               | NP_766498          | Guanylate kinase associated protein; DLGAP2, SAPAP2                             | 303-673                            | b | 5       |
|                  | <b>mPLVAP</b>                   | NP_115774          | plasmalemma vesicle associated protein                                          | 123-438; 211-438                   | b | 5       |
|                  | <b>SPRY2</b>                    | NP_005833          | sprouty 2                                                                       | 133-315                            | c | 3, 4    |
|                  | <b>mSPRY2</b>                   | NM_011897          | mouse sprouty 2                                                                 | 31-315                             | b | 3, 4    |
|                  | <b>SAPAP1</b>                   | O14490             | PSD-95/SAP90-associated protein 1; guanylate kinase-associated protein 1; GKAP1 | 4-282                              | a | 5       |
|                  | <b>SYNJ2b</b>                   | O15056             | synaptojanin 2b                                                                 | 1189-1443                          | a | 1       |
| <b>807-912</b>   | <b>AP2B1</b>                    | NP_001273          | adaptor-related protein complex 2, beta 1 subunit, isoform b                    | 632-937                            | a | 1       |
| <b>1064-1148</b> | <b>FCHSD2</b>                   | NP_055639          | nervous wreck; NWK                                                              | 465-654; 244-600; 214-584          | c | 2, 5    |
| <b>1220-1500</b> | <b>mTIAM-1:</b>                 | U05245             | T-cell lymphoma invasion and metastasis 1                                       | 470-827                            | b | 3, 4    |
| <b>1460-1500</b> | <b>mTRP51</b>                   | NP_035770          | p53 tumor suppressor                                                            | 26-390                             | b | 6       |

\*Library screened: a. brain; b. mouse embryo; c. spleen; d. skeletal muscle; e. macrophage.

\*\*Functional Pathways: 1. Endocytosis/trafficking; 2. membrane curvature; 3. signal transduction; 4. GTPase regulation; 5. cytoskeleton; 6. nuclear function; 7. other; 8. unknown.

ITSN1 binding proteins that have not identified by previous studies are highlighted in yellow
