# Supplementary material for: Intersectin (ITSN) Family of Scaffolds Function as Molecular Hubs in Protein Interaction Networks
Source: PubMed Central journal article supplement (PMC3338775; doi:10.1371/journal.pone.0036023), 2012-04-27
Supplement: pone.0036023.s002.pdf [file pone.0036023.s002.pdf]

**Table S2. ITS2 yeast two-hybrid results**

| aa coordinates | Prey Name       | Accession#     | Prey description                                                | Prey-regions bound (aa)                                                         | Library screened* | Functional Pathways** |   |
|----------------|-----------------|----------------|-----------------------------------------------------------------|---------------------------------------------------------------------------------|-------------------|-----------------------|---|
| 1-130          | <b>AMPH</b>     | AF099118       | amphiphysin                                                     | 39-273                                                                          | a                 | 1, 2                  |   |
|                | <b>FNBP4*</b>   | NP_056123      | formin binding protein 4                                        | 468-618                                                                         | a                 | 2                     |   |
|                | <b>SNAP29</b>   | NP_004773      | soluble NSF attachment protein                                  | 6-254                                                                           | c                 | 1                     |   |
|                | <b>TR4</b>      | NP_003289      | orphan nuclear hormone receptor                                 | 385-615                                                                         | a                 | 6                     |   |
| 238-566        | <b>AOF2</b>     | NP_055828      | amine oxidase domain 2; lysine specific histone demethylase     | 355-499                                                                         | c                 | 6                     |   |
|                | <b>C19orf50</b> | NP_076974      | hypothetical protein LOC79036                                   | 8-123                                                                           | e                 | 3, 4                  |   |
|                | <b>CROP</b>     | O95232         | cisplatin resistance-associated overexpressed protein           |                                                                                 |                   | 6                     |   |
|                | <b>EPS15*</b>   | NP_001972      | EGFR substrate protein 15                                       | 4-534                                                                           | c                 | 1, 3                  |   |
|                | <b>EPS15L1*</b> | NP_067058      | EGFR substrate protein 15-like protein                          | 247-489                                                                         | a                 | 1, 3                  |   |
|                | <b>ERC1</b>     | NP_829883      | Rab6 interacting protein 2/CAST                                 | 570-768                                                                         | a                 | 3-5                   |   |
|                | <b>GOLGA8A</b>  | NP_851422      | golgi auto antigen 8A                                           | 61-476; 92-511; 150-381; 98-403                                                 | c                 | 3, 4                  |   |
|                | <b>GOLGB1</b>   | NP_004478      | golgi autoantigen B1                                            | 1860-2269                                                                       | a                 | 3, 4                  |   |
|                | <b>HOOK2</b>    | NP_037444      |                                                                 | 309-681                                                                         | c                 | 3-5                   |   |
|                | <b>KCTD10#</b>  | NP_114160      | K-channel tetramerization domain containing 10                  | 11-314; 8-314; 3-294                                                            | c                 | 6                     |   |
|                | <b>NBR1</b>     | NP_005890      | neighbor of BRCA1 gene 1                                        | 298-482                                                                         | c                 | 8                     |   |
|                | <b>PDE4DIP</b>  | NP_055459      | phosphodiesterase 4D interacting protein, isoform 5; myomegalin | 602-845                                                                         | a                 | 5                     |   |
|                | <b>RNF20</b>    | NP_062538      | ub ligase                                                       | 108-567;43-586                                                                  | a; c              | 3                     |   |
|                | <b>SNAP29</b>   | NP_004773      | soluble NSF attachment protein                                  | 6-254                                                                           | c                 | 1                     |   |
|                | <b>STX4</b>     | NP_004595      | Syntaxin4                                                       | 61-119                                                                          | e                 | 1                     |   |
|                | <b>STX4A</b>    | NP_004595      | Syntaxin4                                                       | 1-145                                                                           | e                 | 1                     |   |
|                | <b>TACC1</b>    | NP_006274      | transforming acidic coiled-coil containing protein 1            | 617-711                                                                         | e                 | 5                     |   |
|                | <b>TRIO</b>     | NP_009049      | Rho GEF                                                         | 475-734                                                                         | a                 | 3, 4                  |   |
|                | 567-805         | <b>ANKRD17</b> | NP_115593                                                       | gene trap ankyrin repeat; serologically defined breast cancer antigen NY-BR-16; | 203-390           | a                     | 6 |
|                |                 | <b>DAPLE</b>   | NP_001073883                                                    | DVL-binding protein DAPLE                                                       | 729-912;510-911   | c                     | 5 |
| <b>DST</b>     |                 | NP_001714      | dystonin;bullous pemphigoid antigen 1; BPAG1                    | 1476-1616                                                                       | c                 | 5                     |   |

|                 |                |                  |                                                                           |                                                                                 |      |      |
|-----------------|----------------|------------------|---------------------------------------------------------------------------|---------------------------------------------------------------------------------|------|------|
|                 | <b>ERC1</b>    | NP_055879        | Rab6 interacting protein 2/CAST                                           | 570-768                                                                         | a    | 3-5  |
|                 | <b>RABEP1</b>  | NP_004694        | Rabaptin-5                                                                | 466-737                                                                         | a    | 3, 4 |
|                 | <b>ROCK1</b>   | NP_005397        | Rho kinase                                                                | 627-834                                                                         | c    | 3-5  |
|                 | <b>RUFY1</b>   | AAK50771         | FYVE-finger protein; Rab4 interacting protein                             | 272-459                                                                         | c    | 3, 4 |
|                 | <b>TMF1</b>    | NP_009045        | TATA element modulatory factor 1                                          | 567-805                                                                         | c    | 6    |
| <b>955-1180</b> | <b>AGT</b>     | NP_000020        | angiotensinogen; SERPINA8                                                 | 211-485                                                                         | a    | 7    |
|                 | <b>AHDC1</b>   | NP_00102505<br>3 | AT hook, DNA binding motif, containing 1                                  | 49-300                                                                          | c    | 6    |
|                 | <b>CBL</b>     | NP_005179        | Ub ligase                                                                 | 485-710                                                                         | c    | 3    |
|                 | <b>CHIC2</b>   | NP_036242        | cystein-rich hydrophobic domain 2                                         | 44-160;64-165;                                                                  | c    | 7    |
|                 | <b>CPSF6</b>   | NP_008938        | ABL-associated protein 1                                                  | 164-505                                                                         | a    | 6    |
|                 | <b>DNM2</b>    | NP_004936        | dynaminII                                                                 | 661-866;763-866                                                                 | c    | 1, 3 |
|                 | <b>FAM59B</b>  | XP_097977        | family with sequence similarity 59                                        | 411-609                                                                         | c    | 8    |
|                 | <b>FASLG</b>   | NP_000630        | FAS ligand                                                                | 6-281                                                                           | c    | 3, 4 |
|                 | <b>FCHSD1</b>  | NP_258260        | Nervous wreck 2; NWK2                                                     | 478-650                                                                         | c    | 2, 5 |
|                 | <b>FCHSD2</b>  | NP_055639        | Nervous wreck; NWK                                                        | 491-665;246-425;459-609;465-652;468-676;244-600;279-656;460-601;244-600;465-654 | a; c | 2, 5 |
|                 | <b>GOLGB1</b>  | NP_004478        | golgi autoantigen B1                                                      | 1392-1657                                                                       | a    | 3-5  |
|                 | <b>GPNMB</b>   | NP_002501        | glycoprotein (transmembrane) nmb isoform b                                | 249-336;316-385                                                                 | e    | 8    |
|                 | <b>HNRPK</b>   | Q15671           | heterogeneous nuclear ribonucleoprotein K, isoform b                      | 141-440;193-463                                                                 | a    | 6    |
|                 | <b>ITPKA</b>   | P23677           | inositol 1,4,5-triphosphate 3-kinase A                                    | 320-461                                                                         | a    | 3, 4 |
|                 | <b>LARP6</b>   | NP_060827        | La ribonucleoprotein domain family, member 6, isoform 1                   | 23-300                                                                          | a    | 6    |
|                 | <b>LTBP4</b>   | O75441           | latent transforming growth factor-beta binding protein 4                  | 998-1254;953-1252;942-1255;807-1014                                             | c    | 3, 4 |
|                 | <b>MBNL1</b>   | NP_066368        | muscleblind-like; EXP                                                     | 1-265                                                                           | c    | 6    |
|                 | <b>PDCD6IP</b> | NP_037506        | ALIX, AIP1; ALG2 IP                                                       | 682-868; 616-868                                                                | a    | 1    |
|                 | <b>PIK3AP1</b> | NP_689522        | phosphoinositide-3-kinase adaptor protein 1; BCAP:Abi interacting protein | 640-804; 283-805                                                                | c; e | 3    |
|                 | <b>PIK3C2β</b> | NP_002637        | PI3K class 2β isoform                                                     | 105-552                                                                         | c    | 3    |
|                 | <b>RBMX</b>    | NP_002130        | RNA binding motif protein, X chromosome; hnRNP-G                          | 44-417                                                                          | a    | 6    |

|                  |                |           |                                                                 |                                                      |      |         |
|------------------|----------------|-----------|-----------------------------------------------------------------|------------------------------------------------------|------|---------|
|                  | <b>REPS1</b>   | NP_114128 | RALBP1 associated Eps domain containing 1                       | 434-591; 510-735; 491-736                            | c    | 1, 3, 4 |
|                  | <b>SAPAP1</b>  | O14490    | PSD95/Dlg-assoc protein                                         | 7-288; 4-282                                         | a    | 5       |
|                  | <b>SH3KBP1</b> | NP_114098 | CIN85                                                           | 295-665                                              | a    | 1, 3    |
|                  | <b>SOS1</b>    | Q07889    | Ras GEF                                                         | 1131-1207                                            | c    | 3, 4    |
|                  | <b>SOS2</b>    | NP_008870 | Ras GEF                                                         | 1022-1203;738-1257                                   | c; e | 3, 4    |
|                  | <b>SYN1</b>    | NP_008881 | synapsin I                                                      | 1-146                                                | a    | 1       |
|                  | <b>SYNJ2b</b>  | O15056    | synaptojanin 2b                                                 | 1100-1443                                            | a    | 1       |
|                  | <b>WASF2</b>   | Q8IV90    | Wasp family membe 4; SCAR2                                      | 21-378                                               | c    | 4, 5    |
|                  | <b>WASL</b>    | NP_003932 | N-Wasp                                                          | 287-383                                              | e    | 4, 5    |
|                  | <b>WASP</b>    | NP_000368 | Wiscott-Aldrich Syndrome protein                                | 12-396; 158-371                                      | c    | 4, 5    |
|                  | <b>WASPIP</b>  | NP_003378 | Wasp interacting peptide; WIP                                   | 266-472; 268-461; 284-477; 353-503; 275-503; 280-474 | c    | 5       |
|                  | <b>WIRE</b>    | NP_573571 | WASP interacting protein (WIP)-related protein,                 | 264-440                                              | c    | 5       |
|                  | <b>YLPM1</b>   | Q8NBB9    | YLP motif containing 1                                          | 1120-1484                                            | c    | 8       |
| <b>1027-1110</b> | <b>FCHSD2</b>  | NP_055639 | Nervous wreck; NWK                                              | 405-579                                              | c    | 2, 5    |
| <b>1187-1394</b> | <b>GOLGA2</b>  | NP_004477 | golgin subfamily a, 2                                           | 245-580                                              | c    | 3-5     |
|                  | <b>PDE4DIP</b> | NP_055459 | phosphodiesterase 4D interacting protein, isoform 5; myomegalin | 727-884;651-965;749-1102; 767-967                    | c; e | 5       |
|                  | <b>RUFY1</b>   | AAK50771  | FYVE-finger protein; Rab4 interacting protein                   | 421-600                                              | c    | 3, 4    |
|                  | <b>SH3GL1</b>  | NP_003016 | EEN; SH3p8                                                      | 88-292                                               | c    | 1, 2    |

\*Library screened: a. brain; b. mouse embryo; c. spleen; d. skeletal muscle; e. macrophage.

\*\*Functional Pathways: 1. Endocytosis/trafficking; 2. membrane curvature; 3. signal transduction; 4. GTPase regulation; 5. cytoskeleton; 6. nuclear function; 7. other; 8. unknown.

ITSN2 binding proteins that have not identified by previous studies are highlighted in yellow
